# Supplementary material for: Molecular Characteristics of Malignant Ovarian Germ Cell Tumors and Comparison With Testicular Counterparts: Implications for Pathogenesis
Source: PubMed Central journal article supplement — Endocr Rev. 2013 Apr 10;34(3):339–76. doi: 10.1210/er.2012-1045 (PMC3787935; doi:10.1210/er.2012-1045), 2013-04-10
Supplement: supp_er.2012-1045_Binder1.pdf [file supp_er.2012-1045_Binder1.pdf]

# Supplementary Fig. 1 Kraggerud - Høe Hansen

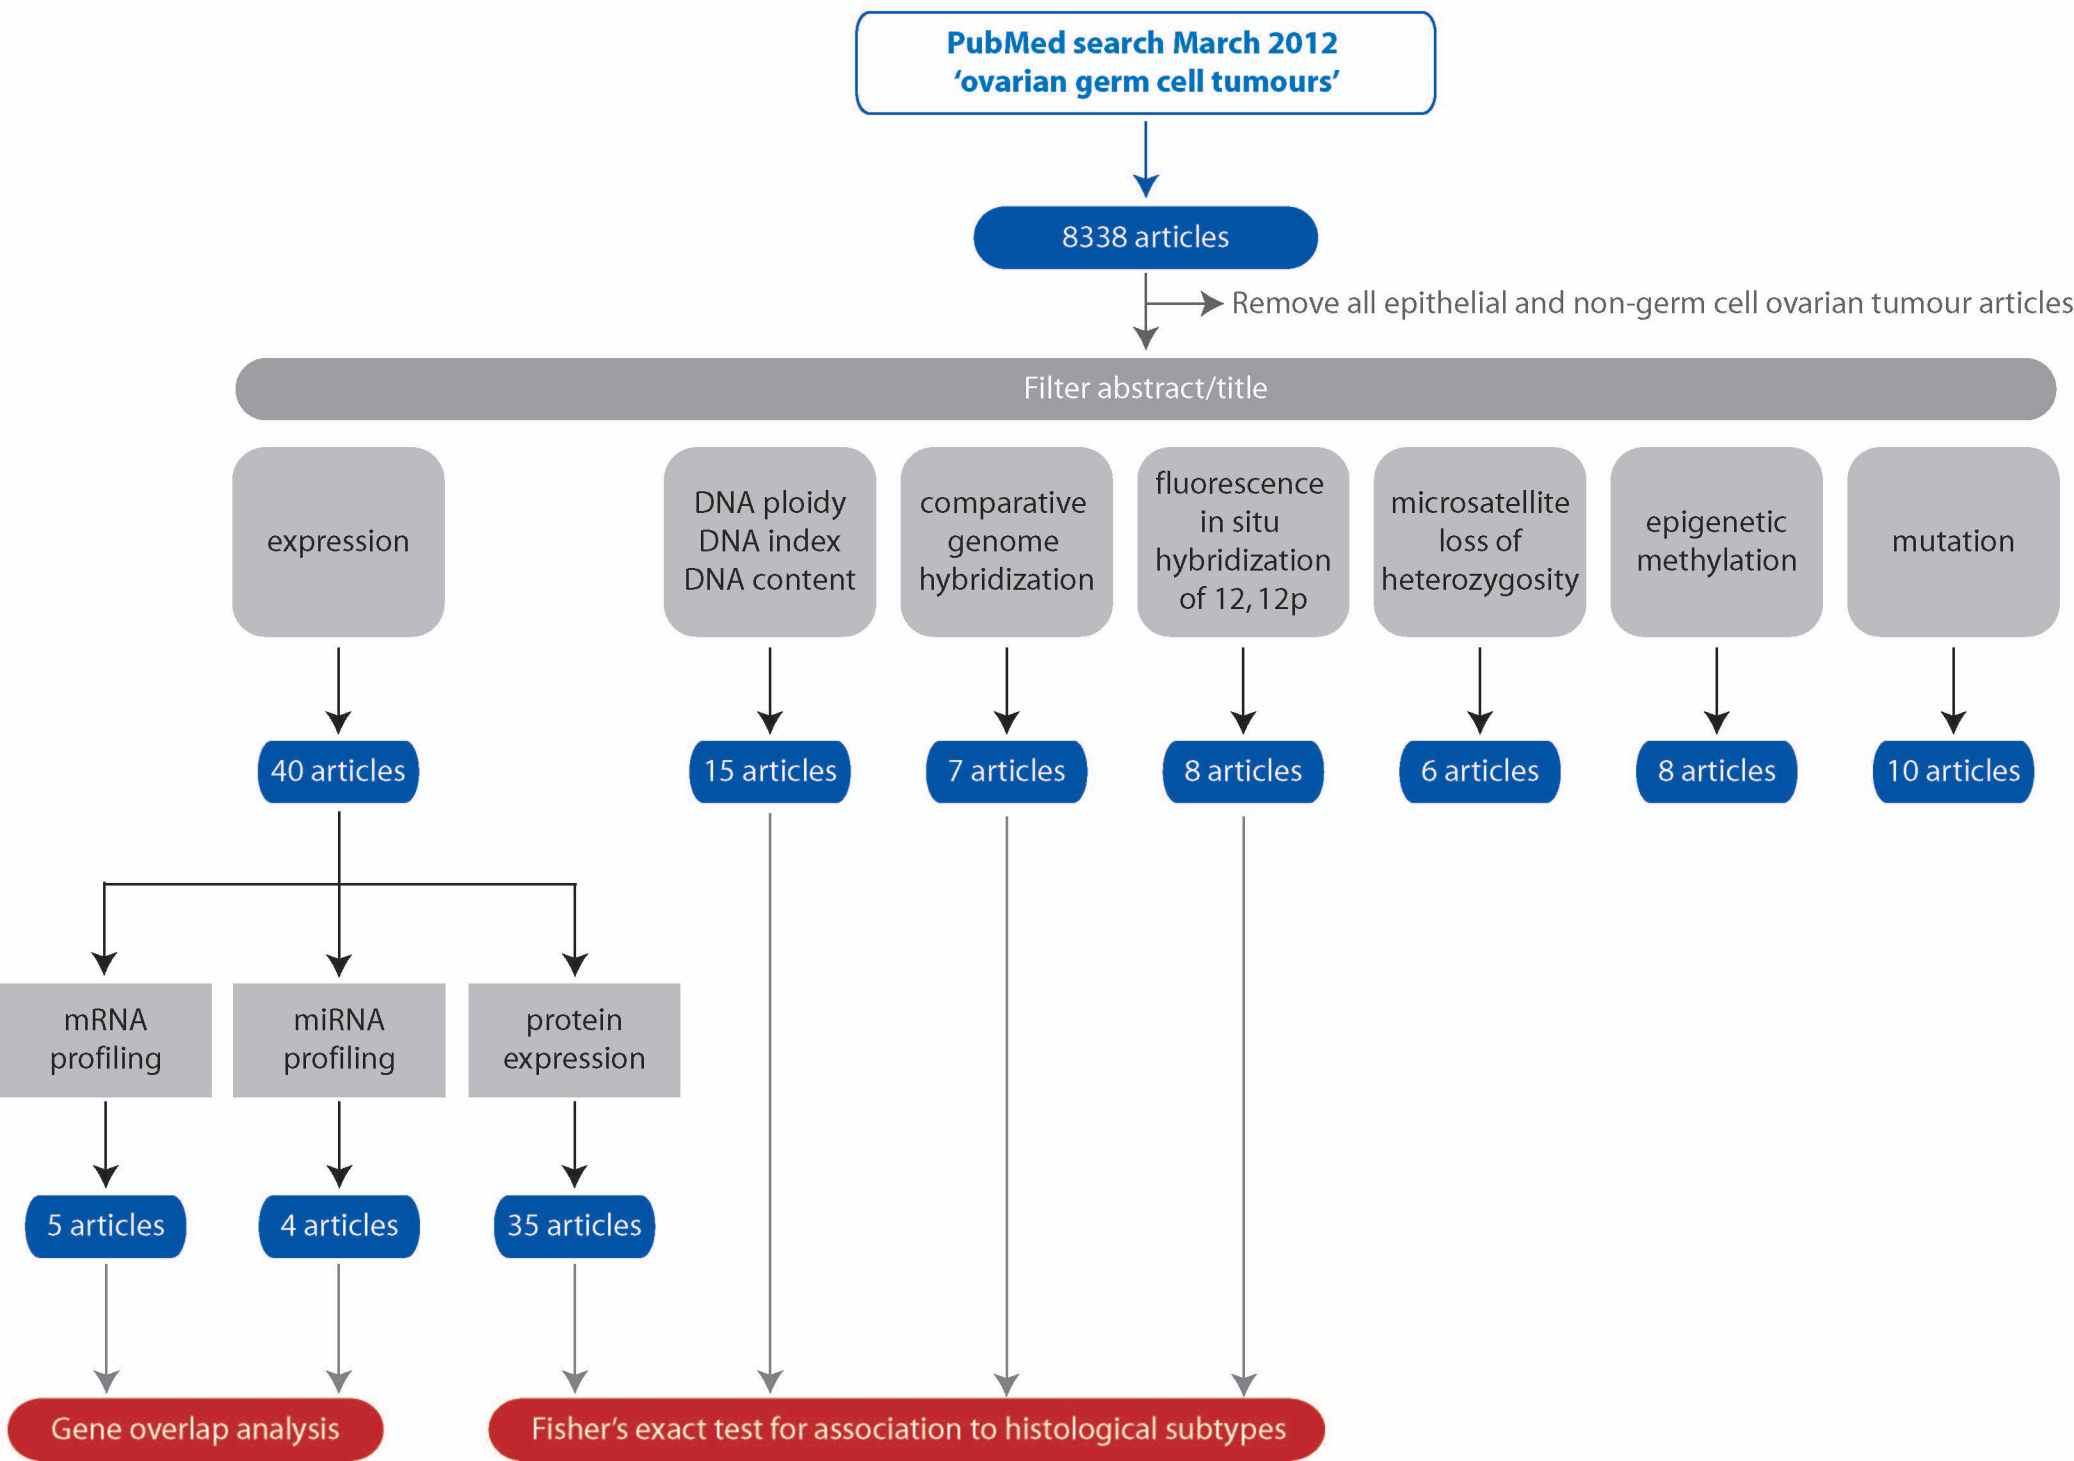

## **Supplemental figures**

Supplemental Fig. 1. Flowchart of the article searches and filtering applied for this review.

## Supplemental Tables

Supplemental Table 1. Ploidy status among mOGCT histological subtypes as determined by image cytometry or flow cytometry. Abbreviations: D, diploid, DG, dysgerminoma; CC, choriocarcinoma EC, embryonal carcinoma; IT, immature teratoma; NonD; non-diploid; YST, yolk sac tumour. If reported, further number of tumours and ploidy classification is given by T, tetraploid, A, aneuploid, and P, polyploid. \*, 4/4 metastasing teratoma, no further specification; IT $\square$ , IT with YST components detected on second review.

| <i>n</i> patients<br>( <i>n</i> samples) | DG        |                     | YST        |                     | IT         |             | EC        |             | Mixed or components of mixed mOGCT |                                                      | Ref          |
|------------------------------------------|-----------|---------------------|------------|---------------------|------------|-------------|-----------|-------------|------------------------------------|------------------------------------------------------|--------------|
|                                          | D         | NonD                | D          | NonD                | D          | NonD        | D         | NonD        | D                                  | NonD                                                 |              |
| 44(45)                                   | 0/16      | 16/16<br>(9T, 7A)   | 0/9        | 9/9<br>(5T, 3A, 1P) | 13/13      | 0/13        |           |             | 2/7<br>(2 IT)                      | 5/7 (4A, 1P)<br>(3DG, 1CC, 1YST)                     | (135)        |
| 1(2)                                     | 0/2       | 2/2<br>(1T, 1A)     |            |                     |            |             |           |             |                                    |                                                      | (132)        |
| 22(26)                                   | 1/6       | 5/6<br>(3T, 2A)     | 1/4        | 3/4<br>(2T, 1A)     | 5/5        | 0/5         |           |             | 4/11<br>(3IT, 1IT $\square$ )      | 7/11 (1T, 6A)<br>(1mixed, 2IT $\square$ , 3YST, 1EC) | (139)        |
| 9(11)                                    |           |                     | 0/3        | 3/3<br>(2T, 1A)     | 2/4        | 2/4<br>(2A) |           |             | 1/4<br>(1DG)                       | 3/4 (2A, 1T)<br>(2YST, 1IT)                          | (136)        |
| 4(5)                                     | 0/2       | 2/2                 |            |                     |            |             |           |             | 1/3<br>(1MT)                       | 2/3<br>(1CC/YCT, 1YST)                               | (148)        |
| 4(4)                                     | 0/2       | 2/2<br>(2A)         |            |                     |            |             |           |             | 0/2                                | 2/2 (2A)<br>(1DG/YST,<br>1DG/YST/EC)                 | (137)        |
| 22(24)                                   | 5/24      | 19/24<br>(16T, 3A)  |            |                     |            |             |           |             |                                    |                                                      | (138)        |
| 5(5)                                     |           |                     | 1/3        | 2/3<br>(2A)         |            |             |           |             | 1/2<br>(mixed/YST)                 | 1/2 (1A)<br>(mixed/YST)                              | (141)        |
| 2(2)                                     |           |                     | 0/2        | 2/2<br>(2A)         |            |             |           |             |                                    |                                                      | (146)        |
| 20(22)                                   |           |                     | 1/14       | 13/14               |            |             |           |             | 2/8<br>(2DG)                       | 6/8<br>(2YST/MT, 1YST/EC,<br>1YST/CC, 2 YST/DG)      | (142)        |
| 3(3)                                     | 0/1       | 1/1                 | 2/2        | 0/2                 | *          |             |           |             |                                    |                                                      | (147)        |
| 25(25)                                   | 0/25      | 25/25<br>(14A, 11P) |            |                     |            |             |           |             |                                    |                                                      | (140)        |
| 2(2)                                     | 0/1       | 1/1                 |            |                     | 1/1        | 0/1         |           |             |                                    |                                                      | (145)        |
| 1(1)                                     |           |                     |            |                     |            |             | 0/1       | 1/1         |                                    |                                                      | (143)        |
| 4(4)                                     | 1/2       | 1/2 (1A)            |            |                     | 2/2        | 0/2         |           |             |                                    |                                                      | (144)        |
| 168(181)                                 | 7/81      | 74/81               | 5/37       | 32/37               | 23/25      | 2/25        | 0/1       | 1/1         | 11/37                              | 26/37                                                | <b>Total</b> |
|                                          | <b>9%</b> | <b>91%</b>          | <b>14%</b> | <b>86%</b>          | <b>92%</b> | <b>8%</b>   | <b>0%</b> | <b>100%</b> | <b>30%</b>                         | <b>70%</b>                                           | <b>(%)</b>   |

Supplemental Table 2. DNA copy number alterations in 81 primary mOGCT detected by chromosomal/metaphase or array CGH, sorted by histology and retaining original case number as in references (131;132;149-152). Abbreviations: Bil. DG, bilateral DG; DG, dysgerminoma; GB, gonadoblastoma; IT, immature teratoma; MT, mature teratoma; TER, teratoma (unspecified); YST, yolk sac tumour. For ref. 152, specific regions for gains and losses were not reported explicitly; as such these were extracted from the graphical illustrations to the resolution of chromosome arms.

| Tumour type | Case no. | Gains                                                                                                            | Losses                                                            | Age (yrs) | Ref.  |
|-------------|----------|------------------------------------------------------------------------------------------------------------------|-------------------------------------------------------------------|-----------|-------|
| DG          | 04T      | None                                                                                                             | X                                                                 | 18        | (131) |
| DG          | 09T      | 1p31-ter, 1q22-24, 3p14-21, 3q21-23, 6, 7, 12pter-q12, 12q22-ter, 15q, 17, 19, 20, 22q                           | 4, 5, 9p21-ter, 13q21-ter                                         | 59        | (131) |
| DG          | 14T      | 1p33-ter, 6p21.1-21.3, 9q33-ter, 11q12-13, 12q24.1-ter, 14q31-ter, 16p12-ter, 16q23-ter, 17, 19, 20q, 21q22, 22q | 3q25-26.2, 4p13-q32, 5q14-22, 6q12-23, 9p21-22, 13q21-31, Xq13-23 | 14        | (131) |
| DG          | 15T      | 1q21-23, 7, 8q23-ter, 12pter-q14, 12q23-ter, 17, 21q, 22q12-ter                                                  | 13q21-22                                                          | 17        | (131) |
| DG          | 16T      | 12pter-q13, 12q23-ter, 16p12-ter, 21q21-ter                                                                      | 11q21-ter                                                         | 20        | (131) |
| DG          | 19T      | 8, 12p                                                                                                           | None                                                              | 32        | (131) |
| DG          | 27T      | 1p33-ter, 6p21.3, 9q33-ter, 17pter-q21, 17q24-ter, 20q12-ter, 21q22                                              | None                                                              | 36        | (131) |
| DG          | 35T      | 1q21-24, 1q32-ter, 7, 8, 12q23-ter, 15q, 17, 19, 21q, 22q13                                                      | 13q14-ter                                                         | 18        | (131) |
| DG          | 40T      | 3p21, 3q24-26.3, 6p11.2-21.3, 7, 8, 12, 15q, 19, 20, 21q22                                                       | 4p, 5p, 13q13-ter, X                                              | 21        | (131) |
| DG          | 48T      | 1p33-ter, 8, 12pter-q13, 12q23-ter, 15q, 17, 19, 21q, 22q                                                        | None                                                              | 41        | (131) |
| DG          | 49T      | 4q12-13, 7, 8, 12, 15q, 19, 20q, 22q                                                                             | 4q23-ter, 11p, 11q14-ter, 13q21-22, Xp21-ter, Xq21-ter            | 28        | (131) |
| DG          | 52T      | 2q12-13, 4p15.1-15.3, 8p, 12p, 12q23-ter, 19q, 20, 21q22, 22q13                                                  | 13q21-ter                                                         | 32        | (131) |
| DG          | 1        | 2q,12q                                                                                                           | None                                                              | 12        | (152) |
| DG          | 2        | 1q, 10q, 12p, 12q, 21                                                                                            | 1p, 11q, 13                                                       | 13        | (152) |
| DG          | 3        | 2p, 2q, 6p, 6q, 7p, 8p, 8q, 11p, 12p, 12q, 15, 20p, 20q                                                          | 1p, 11q, 17p, 19p, 19q                                            | 14        | (152) |
| DG          | 4        | 1q, 2q, 12q, 18q, 21                                                                                             | 4q, 13                                                            | 10        | (152) |
| DG          | 5        | 1q, 7q, 12p, 17q, 19p, 19q                                                                                       | None                                                              | 6         | (152) |
| DG          | 6        | 1q, 8q, 12p, 12q, 19p                                                                                            | 3p, 13                                                            | 12        | (152) |
| DG          | 7        | 2q, 7q, 12p, 12q                                                                                                 | 5p, 9p, 11q, 14                                                   | 12        | (152) |
| DG          | 8        | 12p, 19p,19q, 21                                                                                                 | 13                                                                | 13        | (152) |
| DG          | 1        | 12q                                                                                                              | None                                                              | 18        | (149) |
| DG          | 2        | 3, 12p                                                                                                           | 13q21                                                             | 10        | (149) |
| DG          | 3        | 8, 12p, 15, 21                                                                                                   | None                                                              | 16        | (149) |
| DG          | 4        | 1q, 8, 21                                                                                                        | None                                                              | 22        | (149) |
| DG          | 5        | 1q, 7, 8, 12, 15, 19, 20, 21                                                                                     | 5, 13                                                             | 28        | (149) |
| DG          | 6        | 1q, 4q11, 7, 8, 12, 15, 21                                                                                       | 1p, 3, 13                                                         | 14        | (149) |
| DG          | 7        | 1q, 12                                                                                                           | 4, 7p                                                             | 14        | (149) |
| DG          | 8        | 20q                                                                                                              | None                                                              | 9         | (149) |
| DG          | 9        | 8, 12p, Y                                                                                                        | 4                                                                 | 17        | (149) |
| DG          | 10a      | 6p, 12p, 21                                                                                                      | None                                                              | 12        | (149) |
| DG          | 10b      | 7, 12p, 21                                                                                                       | None                                                              | 12        | (149) |

|                          |         |                                                                                         |                               |    |       |
|--------------------------|---------|-----------------------------------------------------------------------------------------|-------------------------------|----|-------|
| DG                       | 29      | 1q, 7, 8, 10, 12p13-pter, 12p11, 19, 21                                                 | 18q                           | 11 | (151) |
| DG                       | 19      | 12p                                                                                     | 1p35-pter, 4q, 13, 21         | 12 | (150) |
| DG<br>(left ovary)       | Bil. DG | 1q22-qter, 8, 12, 15q15-qter, 19, 21q22                                                 | X                             | 16 | (132) |
| DG<br>(right ovary)      | Bil. DG | 2q14-qter, 19, 22q                                                                      | X                             | 16 | (132) |
| DG+CC                    | 17      | None                                                                                    | None                          | 10 | (150) |
| DG+TER                   | 11      | 19p, 21                                                                                 | 13                            | 12 | (152) |
| EC+YST+TER               | 26      | 7, 8, 12p, 19                                                                           | 18q                           | 7  | (151) |
| GB                       | Bil. DG | 1q21-qter, 21q21-qter                                                                   | 13q32-qter, X                 | 16 | (132) |
| IT                       | 06T     | 22q13                                                                                   | None                          | 20 | (131) |
| IT                       | 12T     | None                                                                                    | None                          | 16 | (131) |
| IT                       | 18T     | 1p35-ter, 16p, 19                                                                       | 13q21-31                      | 37 | (131) |
| IT                       | 22T     | None                                                                                    | None                          | 20 | (131) |
| IT                       | 34T     | 1p35-ter, 9q34, 22q12-ter                                                               | None                          | 34 | (131) |
| IT from mixed<br>IT/YST  | 36T     | 11q12-13, 14q21-24                                                                      | None                          | 23 | (131) |
| IT                       | 44T     | None                                                                                    | None                          | 11 | (131) |
| IT                       | 46T     | None                                                                                    | None                          | 15 | (131) |
| IT                       | 51T     | 16p12-ter, 17q24-ter, 19                                                                | None                          | 25 | (131) |
| IT                       | 20      | None                                                                                    | None                          | 21 | (149) |
| IT                       | 21      | None                                                                                    | None                          | 2  | (149) |
| IT                       | 22      | None                                                                                    | None                          | 4  | (149) |
| IT                       | 23      | None                                                                                    | None                          | 11 | (149) |
| IT                       | 24      | 14                                                                                      | None                          | 21 | (149) |
| IT                       | 25      | None                                                                                    | None                          | 25 | (149) |
| IT                       | 30      | 7, 8, 12p, 21                                                                           | None                          | 12 | (151) |
| IT                       | 3       | None                                                                                    | None                          | 1  | (150) |
| mixed mOGCT              | 17      | 8, 12p                                                                                  | None                          | 4  | (149) |
| mixed mOGCT              | 18      | 12p, 21                                                                                 | None                          | 8  | (149) |
| mixed mOGCT              | 19      | 7, 8, 12p                                                                               | 4, 10, 18                     | 15 | (149) |
| MT                       | 27      | None                                                                                    | None                          | 8  | (151) |
| MT                       | 28      | 12p                                                                                     | None                          | 11 | (151) |
| YST                      | 33T     | 1p32-36.1, 1p13-q22, 6p21.2-21.3, 8, 12pter-q13, 12q24.1-ter, 15q13-ter, 17, Xp11.2-q13 | 10p14-ter, 13q21-32, 18q21-22 | 11 | (131) |
| YST                      | 43T     | 1q41-ter, 11q14-ter, 12p, 20q                                                           | 1p34.1-ter, 18q21-ter         | 12 | (131) |
| YST from<br>mixed IT/YST | 45T     | 3, 11, Xp                                                                               | None                          | 70 | (131) |
| YST                      | 55T     | 1q21-23, 1q32-42, 3p21, 12p                                                             | None                          | 22 | (131) |
| YST                      | 20      | 3p, 3q, 8q, 11p                                                                         | 1p, 4q, 5q                    | 14 | (152) |
| YST                      | 21      | 3p, 3q, 4q, 5q, 8q, 12p, 12q, 20p, 20q, 21                                              | 1p, 6q, 15                    | 13 | (152) |
| YST                      | 22      | 1q, 14                                                                                  | 1p, 4p, 4q, 16p, 16q          | 12 | (152) |
| YST                      | 23      | 3q, 5q, 6p, 7p, 9p                                                                      | 1p, 15, 16p, 19p              | 12 | (152) |
| YST                      | 24      | 1q, 2q, 3p, 3q, 6q, 11p, 11q, 21                                                        | 16p, 19p, 19q, 22             | 9  | (152) |
| YST                      | 25      | 1q, 10p, 10q, 12p, 20p, 20q                                                             | 1p, 6q, 8p                    | 14 | (152) |
| YST                      | 26      | 1q, 11q, 19p                                                                            | 6q                            | 13 | (152) |
| YST                      | 33      | 10q, 14, 20q                                                                            | 1p, 4q, 20p                   | 0  | (152) |

|           |    |                |                           |    |       |
|-----------|----|----------------|---------------------------|----|-------|
| YST       | 11 | 1q, 12p, 20    | 1p, 5, 13, 18q            | 12 | (149) |
| YST       | 13 | None           | None                      | 20 | (149) |
| YST       | 16 | None           | None                      | 17 | (149) |
| YST+DG+IT | 16 | None           | None                      | 10 | (150) |
| YST+IT    | 12 | 7p, 8, 12p, 21 | 1p, 9, 11, 13, 15, 20, 22 | 24 | (149) |
| YST+IT    | 14 | 12p, 21        | None                      | 24 | (149) |
| YST+IT    | 15 | 1q, 10, 12     | None                      | 17 | (149) |
| YST+IT    | 18 | 3              | None                      | 12 | (150) |

---

Supplemental Table 3. Overview of gains of whole or parts of chromosome arm 12p among mOGCT histological subtypes as evaluated by FISH, CGH and aCGH. Abbreviations: DG, dysgerminoma; IT, immature teratoma; MT, mature teratoma; YST, yolk sac tumour. \*, only the EC components were analyzed. □ gain of chromosome 12 detected by G-banding.

| DG           | YST   | IT   | MT   | Mixed or component of mixed mOGCT | Technique | Ref   |
|--------------|-------|------|------|-----------------------------------|-----------|-------|
| 1/1          |       | 1/1  | 1/2  | 1/1                               | aCGH      | (151) |
| 1/1          |       |      |      |                                   | aCGH      | (134) |
| 7/10         | 1/3   | 0/6  |      | 6/6                               | CGH       | (149) |
| 8/12         | 3/3   | 0/8  |      | 0/2                               | CGH       | (131) |
| 1/2          |       |      |      |                                   | CGH       | (132) |
| 1/1          |       | 0/1  |      | 0/3                               | CGH       | (150) |
| 6/8          | 2/8   |      |      | 0/1                               | CGH       | (152) |
| 2/2          |       |      |      | 2/2                               | FISH      | (137) |
| 1/1          |       |      |      |                                   | FISH      | (157) |
|              | 1/2   |      |      |                                   | FISH      | (146) |
| 1/2          | 0/1□  | 0/3  | 0/4  | 0/1                               | FISH      | (158) |
| 17/21        |       |      |      |                                   | FISH      | (154) |
|              |       | 0/3  | 0/5  | 5/6                               | FISH      | (155) |
| 18/22        |       |      |      |                                   | FISH      | (156) |
|              |       |      |      | 5/6*                              | FISH      | (153) |
| <b>Total</b> | 64/83 | 7/17 | 1/22 | 1/11                              |           | 19/28 |
| <b>%</b>     | 77%   | 41%  | 5%   | 9%                                |           | 68%   |

Supplemental Table 4. An overview of genome-wide gene expression profiling studies that include mOGCT. The number of samples profiled, the type of analyses performed and the number of significant differentially expressed genes identified are listed. Abbreviations: *cf.*, compared to; DG, dysgerminoma; ex.gd., extragonadal; Germ, germinoma; IT, immature teratoma; MT, mature teratoma; ova, ovarian; Sem, seminoma; SS, spermatocytic seminoma; tes., testicular; YST, yolk sac tumour. \*, includes one sample from a female patient with extragonadal germinoma. <sup>□</sup>, includes both gonadal and extragonadal samples of both histological subtypes, both male and female.

| Study                                    | Samples                                                                                                                          | Genes with higher expression in                            | # mRNAs in gene list | # miRNAs in gene list | Ref   |
|------------------------------------------|----------------------------------------------------------------------------------------------------------------------------------|------------------------------------------------------------|----------------------|-----------------------|-------|
| Looijenga <i>et al.</i> , 2006           | 3 DG, 4 Sem, 5 SS                                                                                                                | DG/Sem <i>cf.</i> SS                                       | 80                   |                       | (165) |
| Fritsch <i>et al.</i> , 2006             | 4 DG, 4 ova. YST                                                                                                                 | DG <i>cf.</i> YST                                          | 22                   |                       | (164) |
|                                          |                                                                                                                                  | YST <i>cf.</i> DG                                          | 11                   |                       |       |
| Palmer <i>et al.</i> , 2008              | 8 DG, 1 Sem, 8 ova. YST, 7 tes. YST                                                                                              | DG/Sem <i>cf.</i> YST                                      | 11                   |                       | (167) |
|                                          |                                                                                                                                  | YST <i>cf.</i> DG/Sem                                      | 11                   |                       |       |
| Palmer <i>et al.</i> , 2010              | 9 female Germ (7 ova. DG)<br>4 male Germ (2 Sem)<br>8 female YST (5 ova. YST)<br>4 male YST (3 tes. YST)<br>3 male EC (1 ex.gd.) | DG/Sem/YST/EC <i>cf.</i> IT/MT/normal gonads/foetal tissue | 44                   | 10                    | (168) |
|                                          | 2 female, 1 male IT (ex.gd.)<br>3 female MT (1 ex.gd.)                                                                           | IT/MT/normal gonads/foetal tissue <i>cf.</i> DG/Sem/YST/EC | 126                  |                       |       |
|                                          | 2 normal testis,<br>2 normal ovaries,<br>2 foetal yolk sacs,<br>2 foetal ovaries                                                 |                                                            |                      |                       |       |
| Gillis <i>et al.</i> , 2007              | 10 DG, 15 Sem, 1 ova. YST, 7 tes. YST, 1 ova EC, 13 tes. EC, 10 teratomas, 4 SS, 3 normal testis, 5 EC cell lines                | SEM <i>cf.</i> EC <i>cf.</i> teratoma                      |                      | 11                    | (169) |
| Murray <i>et al.</i> , 2010 <sup>□</sup> | 9 female Germ (7 ova. DG), 4 male Germ (2 Sem)                                                                                   | DG/Sem/Germ <i>cf.</i> YST                                 |                      | 37                    | (170) |
|                                          | 8 female YST (5 ova. YST), 4 male YST (3 tes. YST)                                                                               | YST <i>cf.</i> DG/Sem/Germ                                 |                      | 29                    |       |
| Fustino <i>et al.</i> , 2011             | *<br>4 DG ,<br>2 ova. YST, 5 tes. YST                                                                                            | DG <i>cf.</i> YST                                          | 5                    | 14                    | (166) |
|                                          |                                                                                                                                  | YST <i>cf.</i> DG                                          | 29                   | 20                    |       |



Supplemental Table 5. Overview of mRNA/miRNA studies of mOGCT.

mRNA studies

| Ref   | Platform name                     | # probes/genes                     |
|-------|-----------------------------------|------------------------------------|
| (164) | Clontech Atlas Human Cancer array | 588 cancer genes                   |
| (165) | Affymetrix HG-U133A plus 2.0      | 54k                                |
| (166) | RT-PCR                            | 84 TGF- $\beta$ /BMP pathway genes |
| (167) | Affymetrix HG-U133A               | 22k                                |
| (168) | Affymetrix HG-U133A               | 22k                                |

miRNA studies

| Ref   | Platform name                      | # miRNAs profiled |
|-------|------------------------------------|-------------------|
| (166) | $\mu$ Paraflo                      | 782               |
| (168) | miRCURY LNA array v9.2             | 615               |
| (169) | TaqMan MicroRNA Assays Human Panel | 156               |
| (170) | miRCURY LNA array v9.2             | 615               |

Supplemental Table 6. Case studies reporting mRNA/protein expression and/or gene mutations among mOGCT patients. Abbreviations: DG, dysgerminoma; GB, gonadoblastoma; YST, yolk sac tumour; g, mRNA study; p, IHC study.

**Gene/protein expression in OGCT, single patient reports**

| Gene/protein | Associated syndrome            | Histology   | mRNA     | IHC | Ref   |
|--------------|--------------------------------|-------------|----------|-----|-------|
| TRC8         | translocation t(8;22)          | DG          | <i>g</i> | p   | (134) |
| KIT          | D816V <i>KIT</i> mutation      | DG          |          | p   | (270) |
| POU5F1, TSPY | Swyer syndrome                 | GB, DG, YST |          | p   | (341) |
| AFP, TP53    | endometrioid<br>adenocarcinoma | YST         |          | p   | (342) |
|              | -                              | YST         | <i>g</i> |     | (343) |
| <i>HOX8</i>  |                                |             |          |     |       |
| <i>ALPP</i>  |                                | DG          |          | p   | (344) |

<sup>a</sup>Northern blotting

**Gene mutations in OGCT, single patient reports**

| Gene         | Mutation origin | Tumour alteration             | Histology   | Patient syndrome                            | Ref   |
|--------------|-----------------|-------------------------------|-------------|---------------------------------------------|-------|
| <i>SOX9</i>  | germline        | Nonsense mutation             | DG          | campomelic dysplasia,<br>46,XY sex-reversal | (345) |
| <i>PTEN</i>  | germline        | Nonsense mutation, tumour LOH | DG          | Cowden syndrome                             | (346) |
| <i>BRCA2</i> | germline        | No tumour LOH                 | mixed mOGCT | -                                           | (347) |
| <i>FGFR2</i> | germline        | Gain of function mutation     | DG          | Apert syndrome                              | (348) |
| <i>KIT</i>   | germline        | Activating mutation           | IT          | Systemic mastocytosis                       | (349) |
| <i>KIT</i>   | somatic         | Activating mutation           | DG          | -                                           | (270) |
| <i>WT1</i>   | germline        | Disturbed splicing            | GB          | Frasier syndrome                            | (350) |
| <i>BRCA1</i> | germline        | -                             | DG          | -                                           | (351) |
